# Supplementary material
Source: MDPI journal article supplement (https://www.mdpi.com/2673-4591/6/1/27)
Supplement: s1 [file s1]

# Hafnium Zirconium Oxide Thin Films for CMOS Compatible Pyroelectric Infrared Sensors

8th International Symposium on Sensor Science

C. Mart, M. Czernohorsky, K. Kühnel, W. Weinreich

Fraunhofer Institute for Photonic Microsystems

[malte.czernohorsky@ipms.fraunhofer.de](mailto:malte.czernohorsky@ipms.fraunhofer.de)

[www.ipms.fraunhofer.de](http://www.ipms.fraunhofer.de)

# Pyroelectricity

## Overview

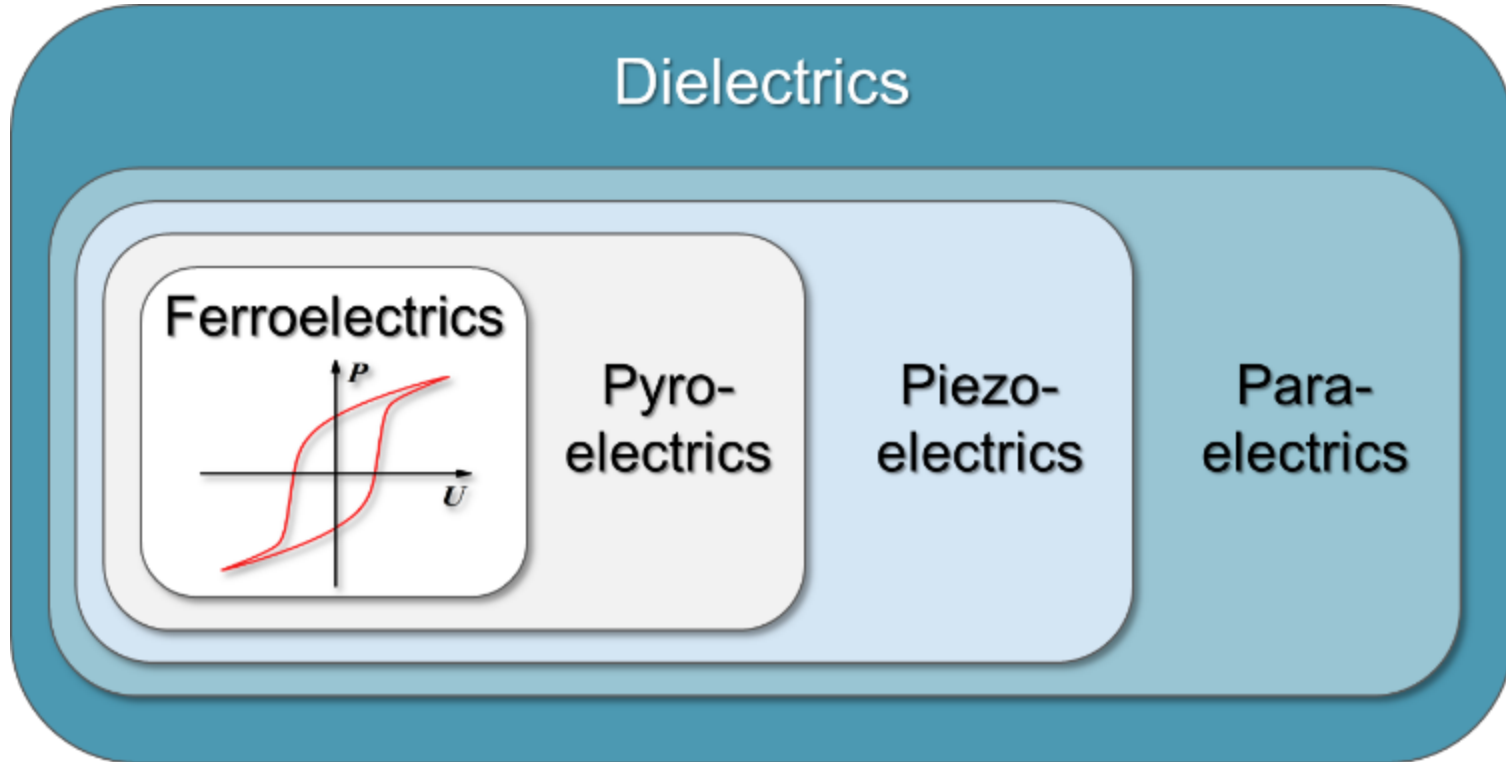

# Pyroelectricity

## Overview

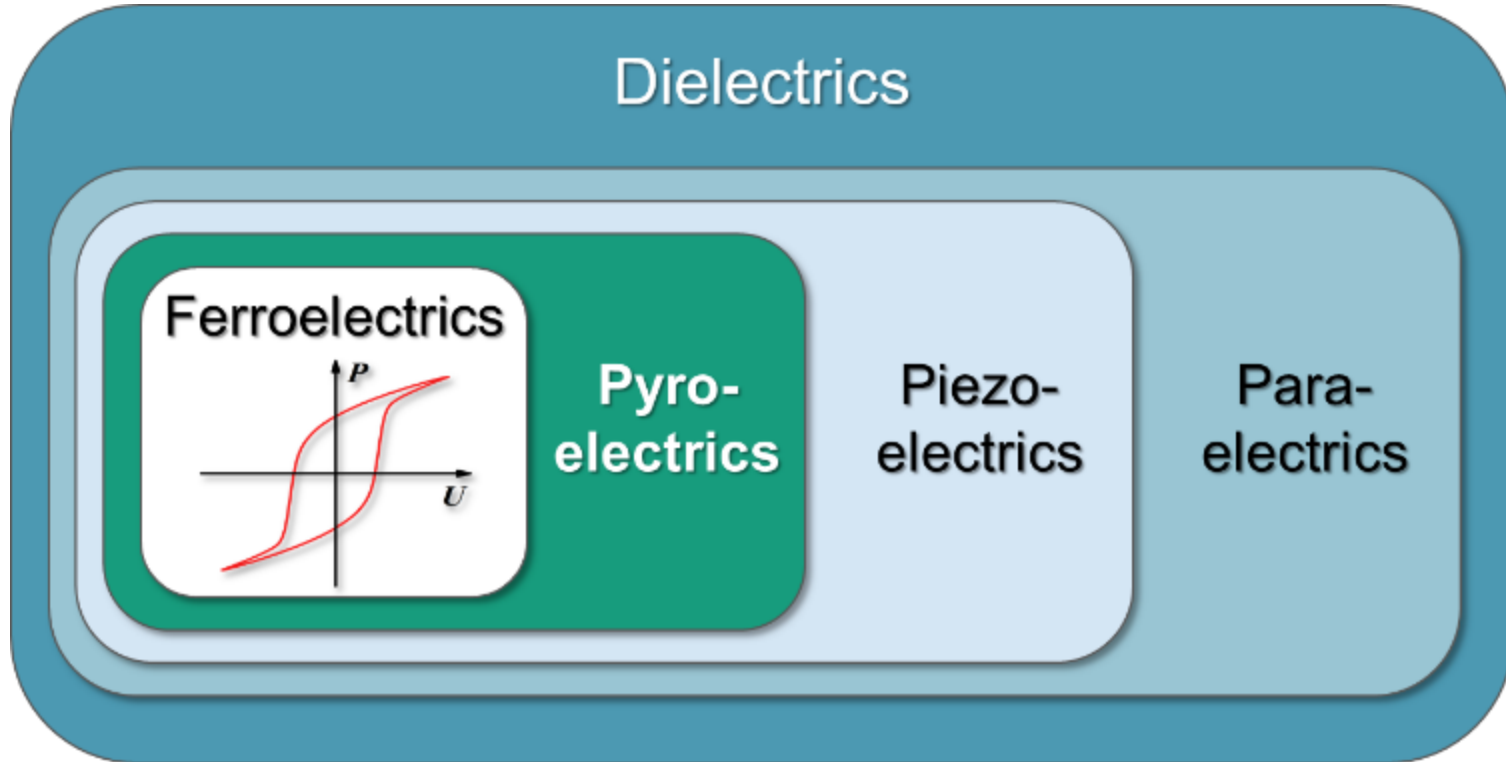

# Doped hafnium oxide: A brief history

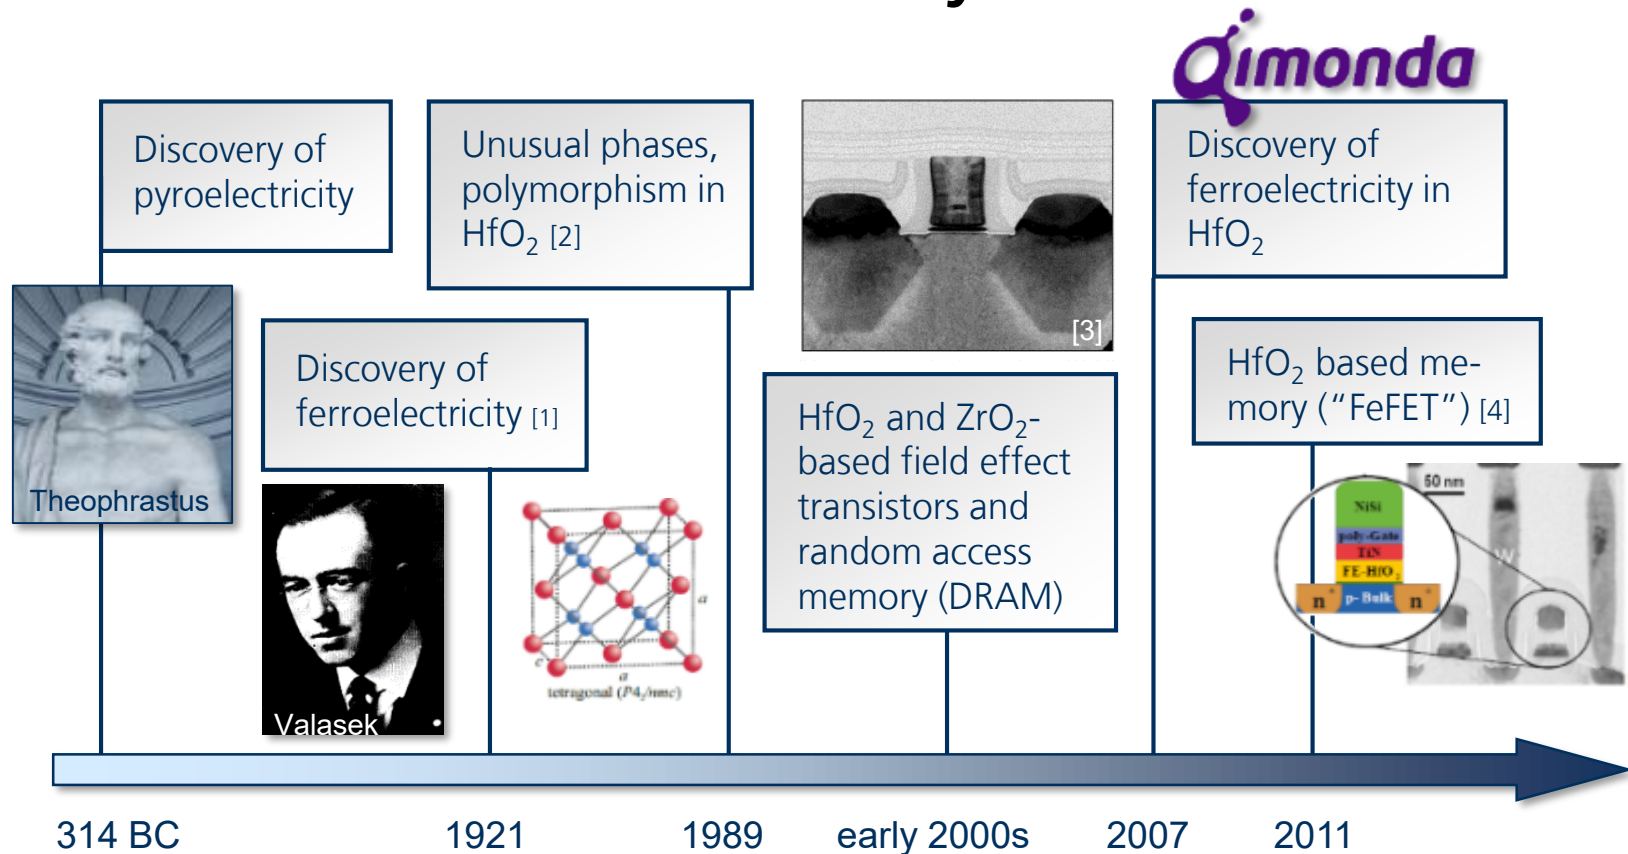

[1] J. Valasek Physical Review 17.4 (1921)  
[2] E. Kisi et al. J. Am. Ceram. Soc. 72 (1989)

[3] K Mistry et al., IEDM 2007  
[4] J. Müller et al., IEDM 2013

# Pyroelectric Infrared Sensors

## Working principle

- The pyroelectric effect corresponds to a polarization change upon temperature variation

$$p_i = \underbrace{\frac{\partial P_i}{\partial T}}_{\text{intrinsic}} + \underbrace{E_j \frac{\partial \varepsilon_{ij}}{\partial T}}_{\text{field-induced}}$$

- The effect can be used for infrared detection
- The generated current is proportional to the rate of temperature change

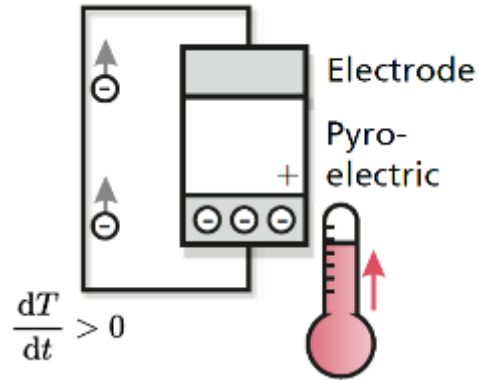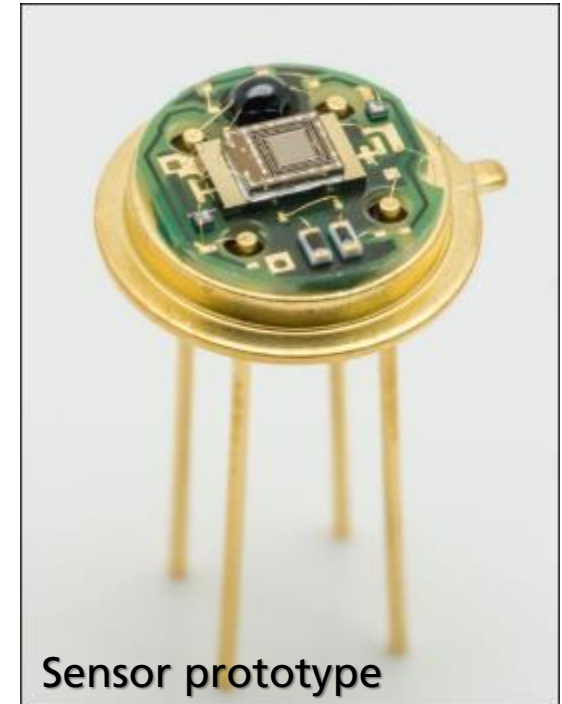

# Infrared Sensor development steps

Pyroelectric effect in doped  $\text{HfO}_2$

Area-enhanced pyro- $\text{HfO}_2$

MEMS integration

Infrared Sensor element

$\text{CO}_2$  Sensor

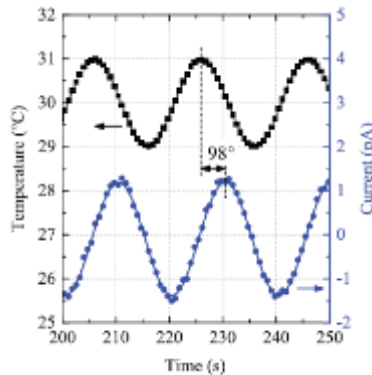

Mart et al., Appl. Phys. Lett. 112, 052905 (2018)

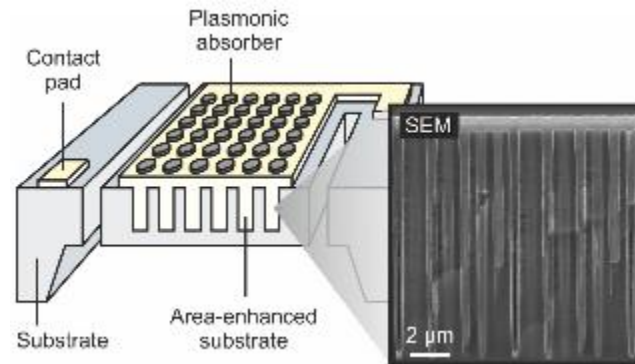

Mart et al., IFCS ISAF 2019

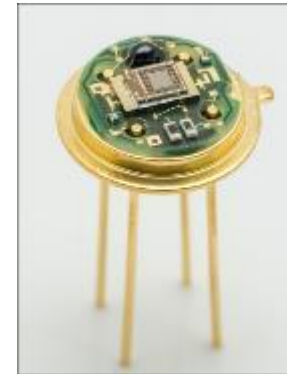

Kindly provided by Infratec GmbH

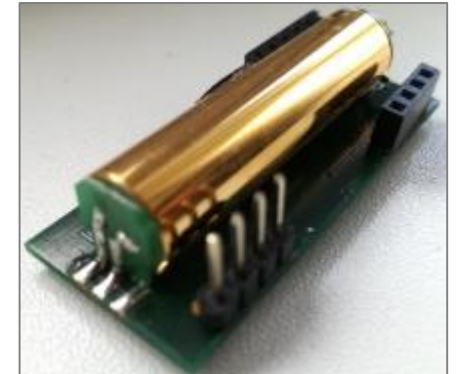

# Pyroelectric sensor technology

## Manufacturing process

- Area-enhanced substrate with 3D structures is used to enhance the pyroelectric response by approx. 20x
- MEMS post-processing forms a thin membrane with reduced heat capacity for fast response
- A further MEMS step isolates the sensor area thermally from the body via “fingers”
- A plasmonic absorber array is formed in the metallization layer
- 300mm technology with i-Line lithography

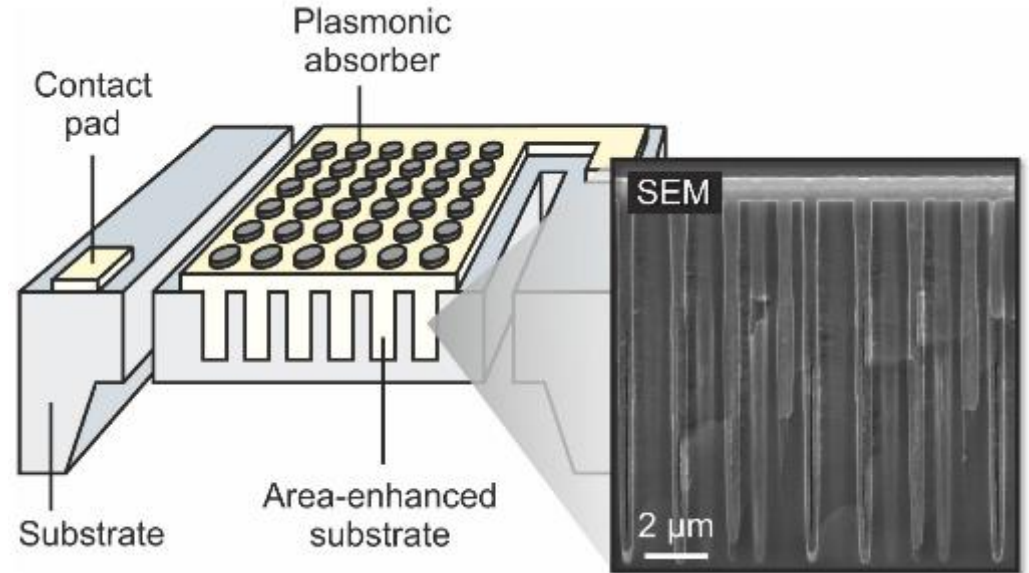



# 3D integration of doped HfO<sub>2</sub> thin films

- Pyroelectric material: 20 nm thick, 4 mol% Si-doped HfO<sub>2</sub> with Al<sub>2</sub>O<sub>3</sub> interlayer (“nano-laminate”)
- The conformal coating of the 3D structures is confirmed

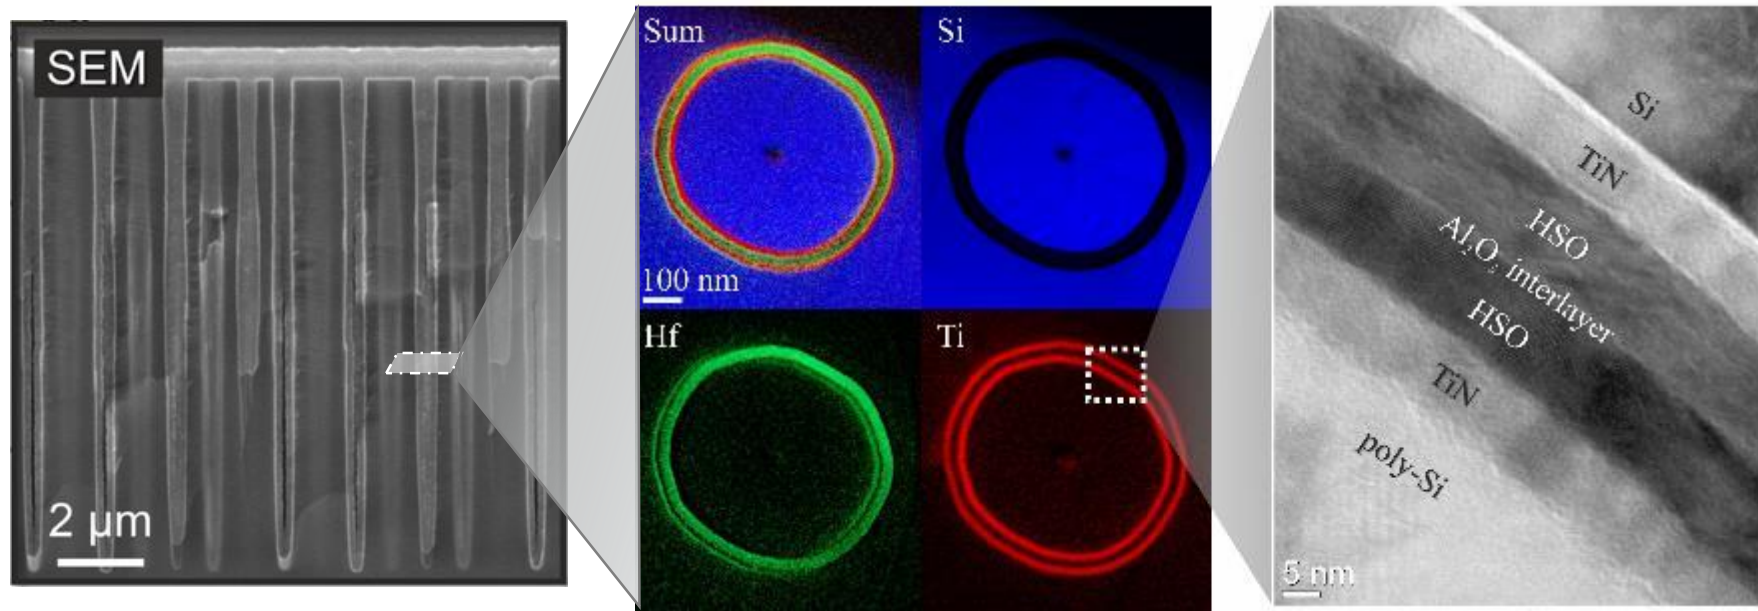



# Electrical characterization

## Ferroelectric properties

- Ferroelectric polarization of doped  $\text{HfO}_2$  on area-enhanced 300mm substrate with 532 dies.
  - $\text{HfZrO}_2$  exhibits a improved uniformity and larger remanent polarization, up to  $331 \mu\text{C cm}^{-2}$
  - Specific area of 11.3 to 15.0 compared to planar results by 3D integration
- Low defect density, >99% functional devices

Si-doped  $\text{HfO}_2$ :

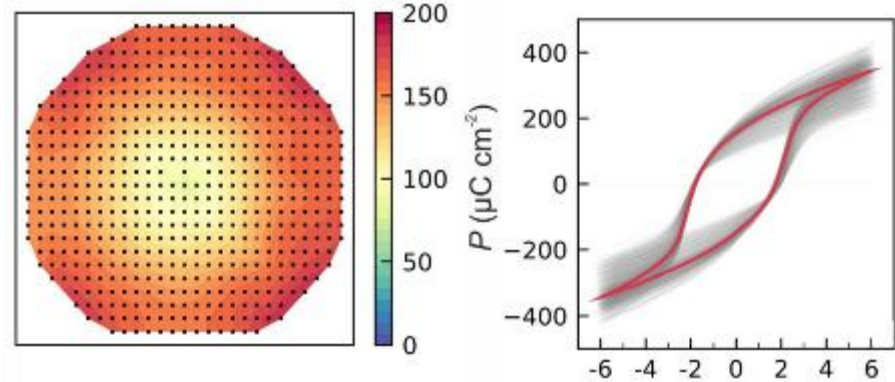

$\text{Hf}_{0.5}\text{Zr}_{0.5}\text{O}_2$ :

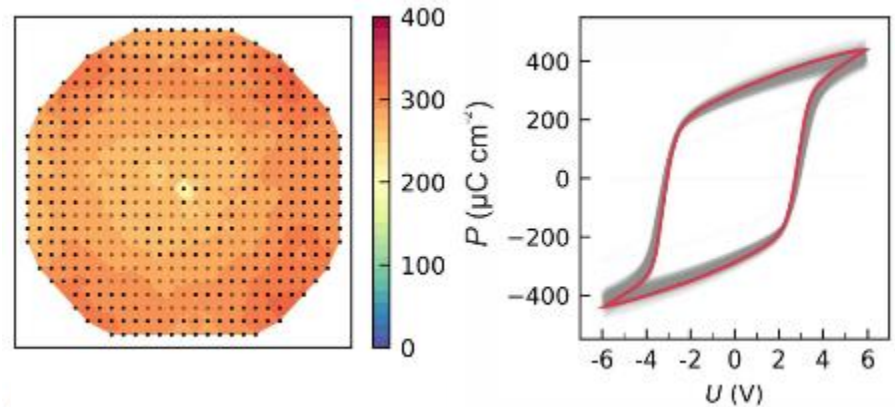

# Pyroelectric characterization

- Pyroelectric measurement is performed by sinusoidal temperature variation ("Sharp-Garn method")
- Although the remanent polarization is smaller, Si-doped  $\text{HfO}_2$  realizes larger pyroelectric current amplitudes

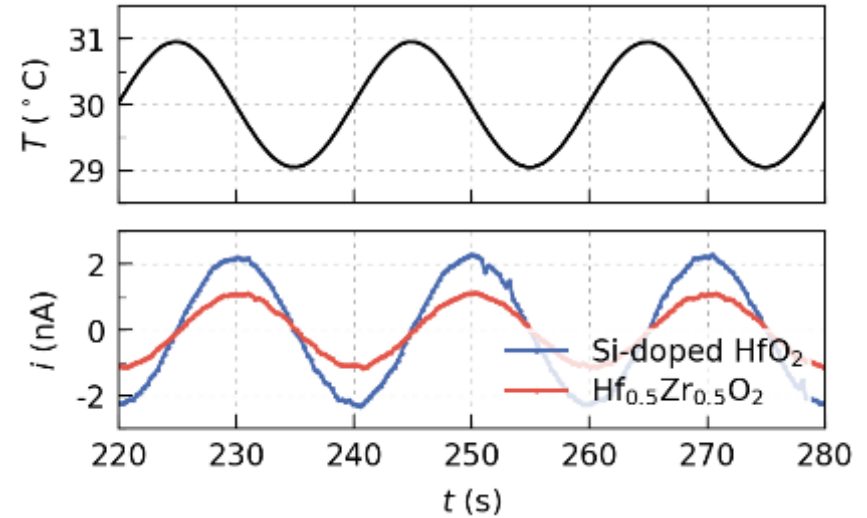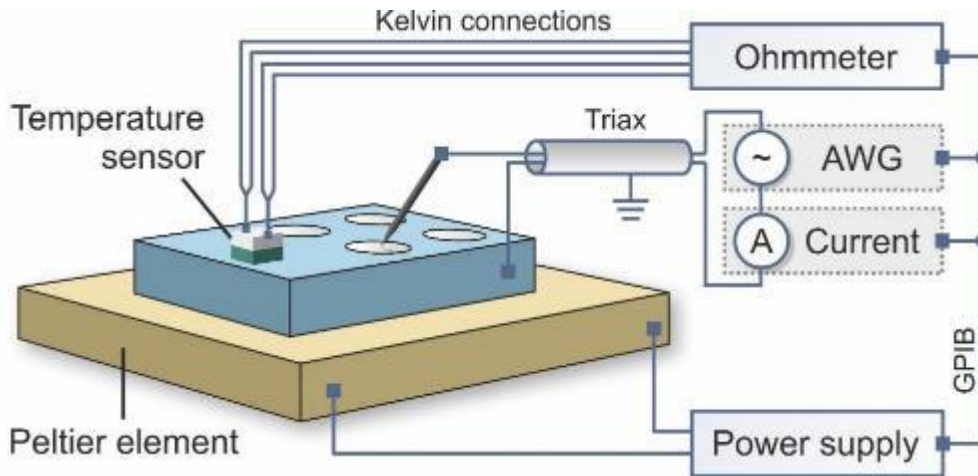

|                                  | Si-doped $\text{HfO}_2$                | $\text{Hf}_{0.5}\text{Zr}_{0.5}\text{O}_2$ |
|----------------------------------|----------------------------------------|--------------------------------------------|
| Virtual pyroelectric coefficient | $-1039 \mu\text{Cm}^{-2}\text{K}^{-1}$ | $-475 \mu\text{Cm}^{-2}\text{K}^{-1}$      |
| Dielectric permittivity          | 36.9                                   | 37.8                                       |
| Aging coefficient                | -5.7 %/dec.                            | -3.6 %/dec.                                |

# Combining 3D integration and antiferroelectricity

- By tuning the Si doping content higher, antiferroelectric behavior is stabilized
- Very large pyroelectric coefficients by combining area enhancement and AFE enhancement
  - $p = -2400 \mu\text{C}/\text{m}^2\text{K}$

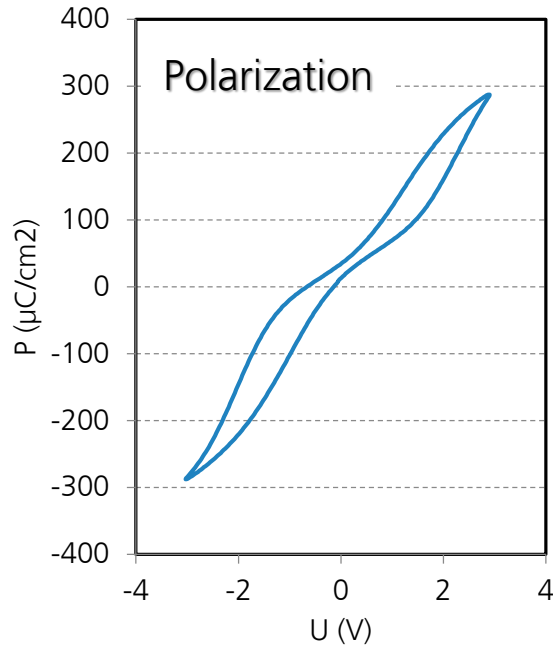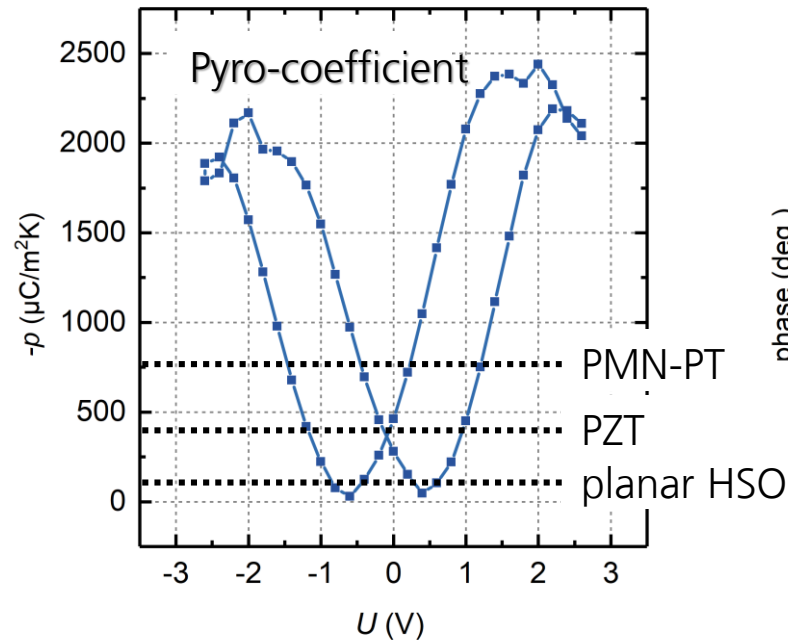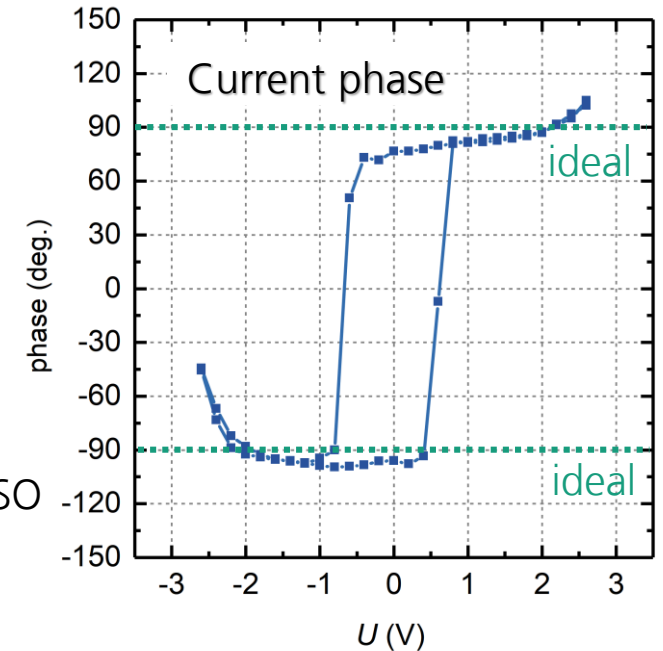

# IR Sensor Test

- The sensor current is amplified and converted to a voltage
- The manufactured sensor element produces a signal which is proportional to the amplitude of the incident infrared light

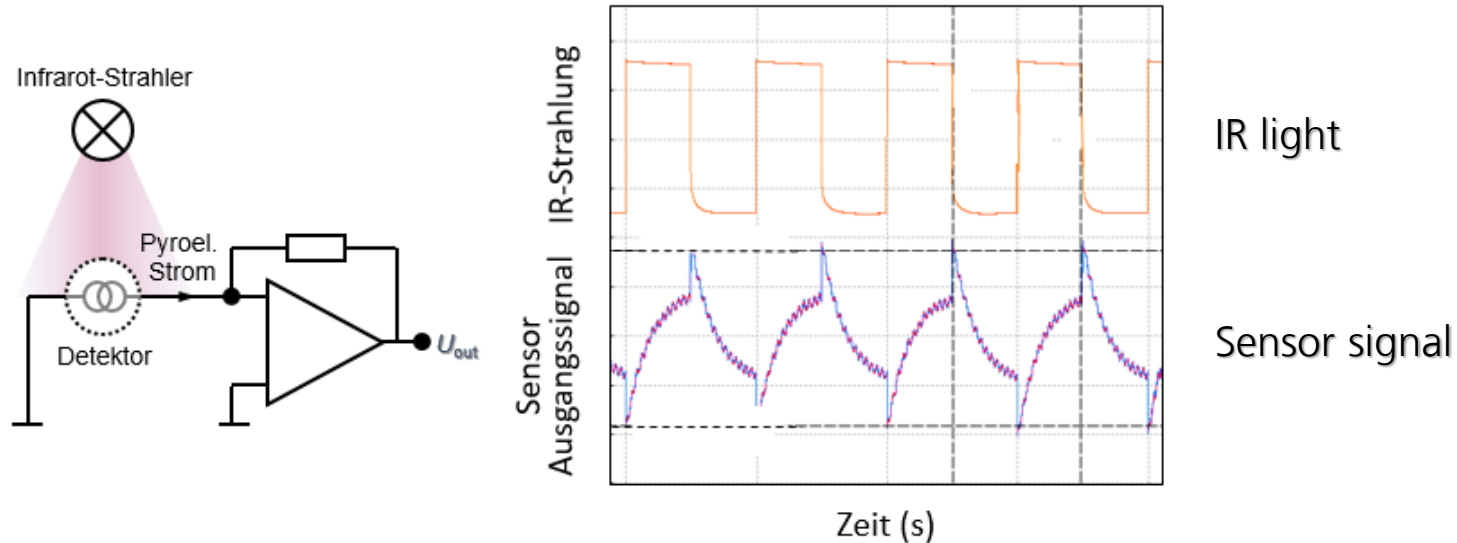

# Thank you for listening!

Contact:

[clemens.mart@ipms.fraunhofer.de](mailto:clemens.mart@ipms.fraunhofer.de)

[www.ipms.fraunhofer.de](http://www.ipms.fraunhofer.de)

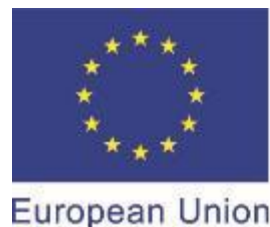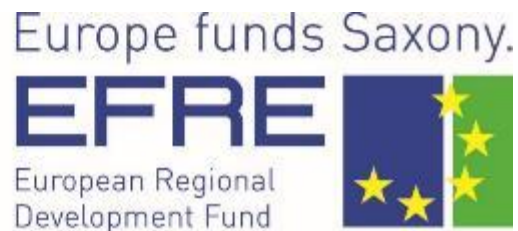

The work in this presentation was supported by funding from the European Regional Development Fund (EFRE) and the Free State of Saxony (Project CONSIVA, No. 100273858).
